# Supplementary material
Source: publisher figshare collection journal article supplement (https://acs.figshare.com/ndownloader/files/4555912)
Supplement: Supplementary file 1 [file 4555912]

## Supporting Information

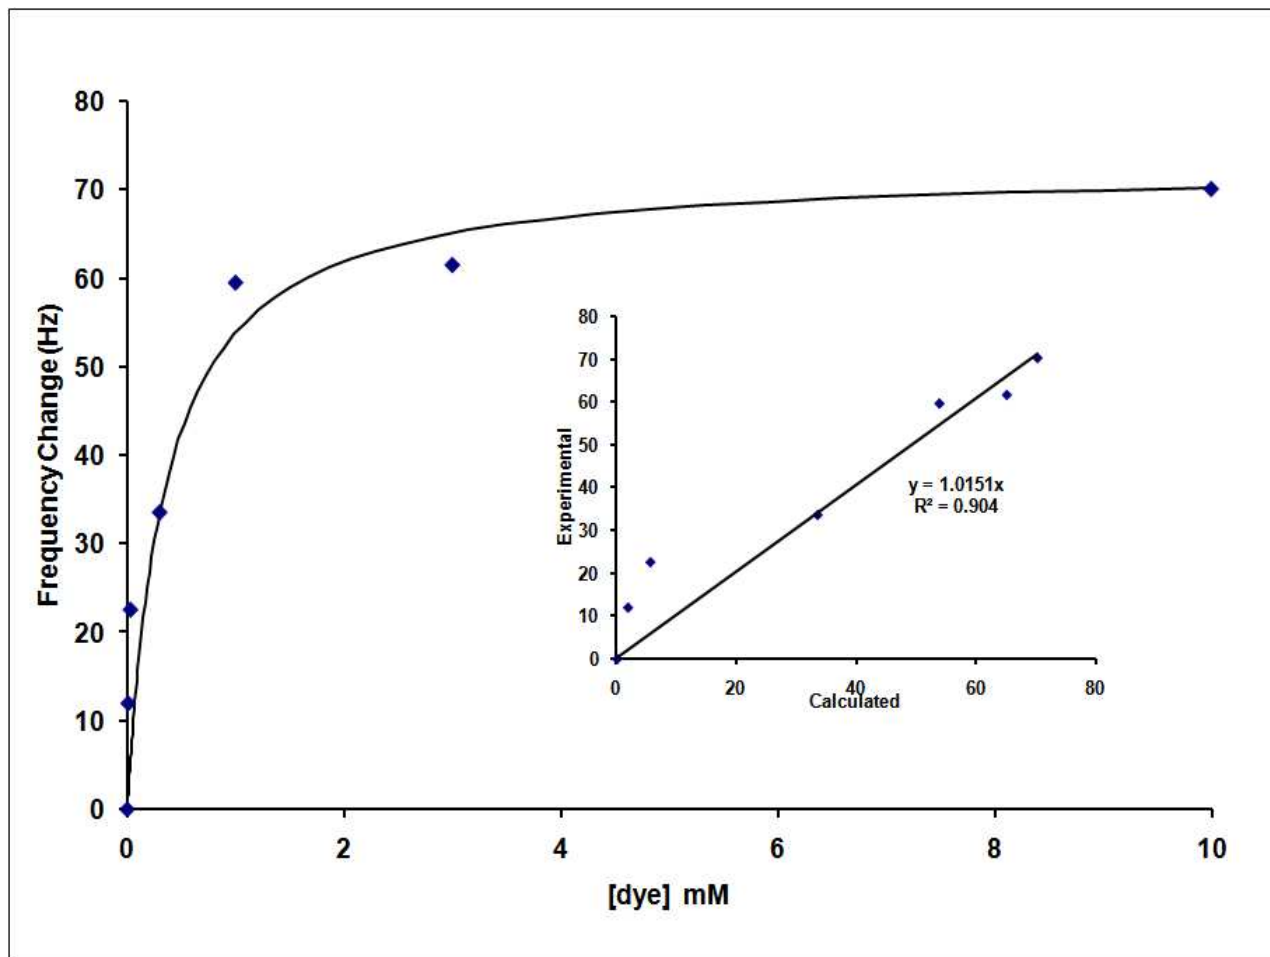

**Figure S1:** Control QCM dissociation constant experiment on a **PDDA/PSS/CT** film. The line represents the fit to a single  $K_d$  model. Inset: Values calculated using the single  $K_d$  model vs. the experimental data.
